# Supplementary material for: Halogen containing clusters N2Br2, N2Br4, S2Br4and S2Br6yield penannular inclusion compounds
Source: Royal Society of Chemistry journal article supplement (doi:10.1039/c5ce01838b), 2015-01-01
Supplement: c5ce01838b1.pdf [file c5ce01838b1.pdf]

# Halogen containing clusters $\text{N}_2\text{Br}_2$ , $\text{N}_2\text{Br}_4$ , $\text{S}_2\text{Br}_4$ and $\text{S}_2\text{Br}_6$ yield penannular inclusion compounds

Solhe F. Alshahateet,<sup>\*a</sup> Mohan M. Bhadbhade,<sup>b</sup> Roger Bishop,<sup>c</sup>  
Donald C. Craig<sup>§c</sup> and Marcia L. Scudder<sup>c</sup>

*a* Department of Chemistry, Faculty of Science, Mutah University, P. O. Box 7, Mutah 61710, Karak, Jordan. E-mail: s\_alshahateet@mutah.edu.jo

*b* Mark Wainwright Analytical Centre, The University of New South Wales, UNSW Sydney NSW 2052, Australia

*c* School of Chemistry, The University of New South Wales, UNSW Sydney NSW 2052, Australia

<sup>§</sup> Deceased 12 May 2009

## Electronic Supplementary Information

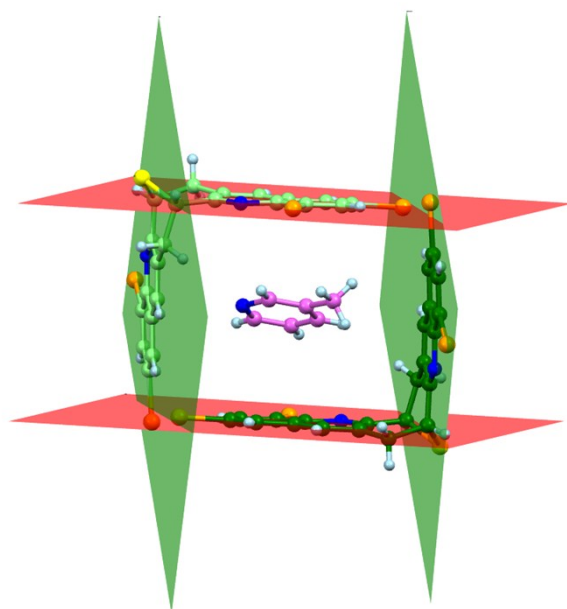

**Fig. S1** Derivation of the molecular pen dimensions in Table 2, for the example of **11**, the  $(7)_2$ -(3-methylpyridine) compound.

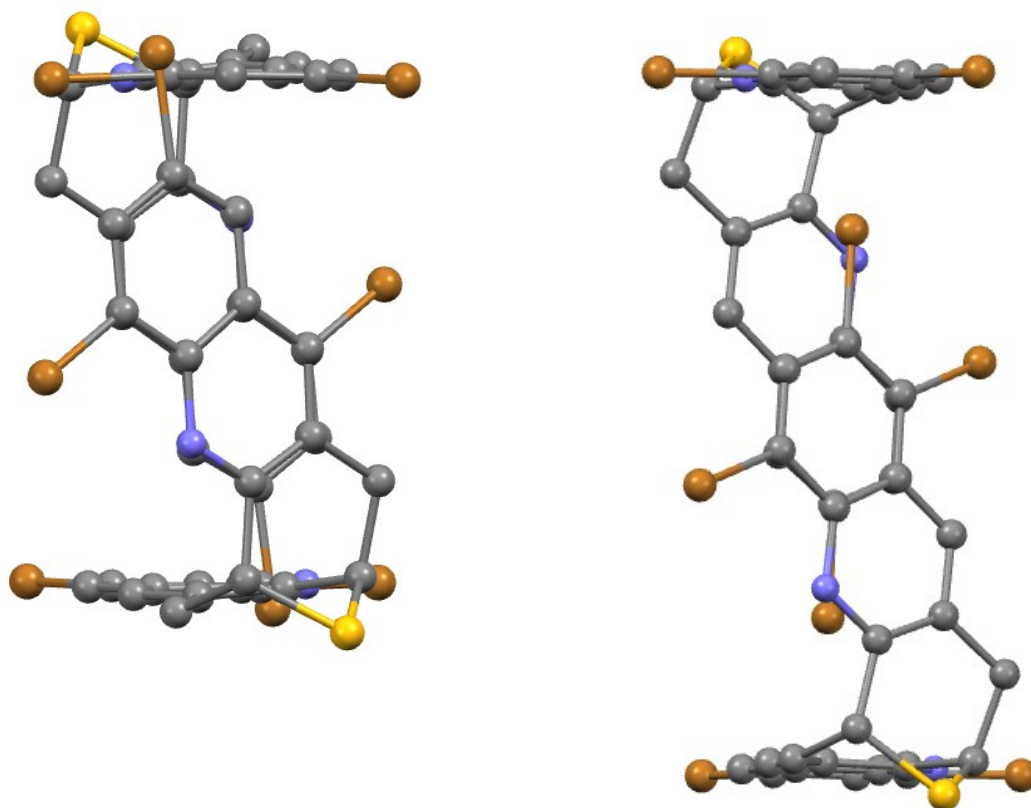

**Fig. S2** Projection views of the long axis molecular pen aromatic wings for (left) **11**, the (3-methylpyridine compound), and (right) **13**, the (2-methylpyridine compound). These illustrate the dimensional increase in the cavity from 7.90 to 11.45 Å. In **11** both host aromatic rings are superposed, whereas in **13** only one ring is superposed on projection. All hydrogen atoms are omitted for clarity.

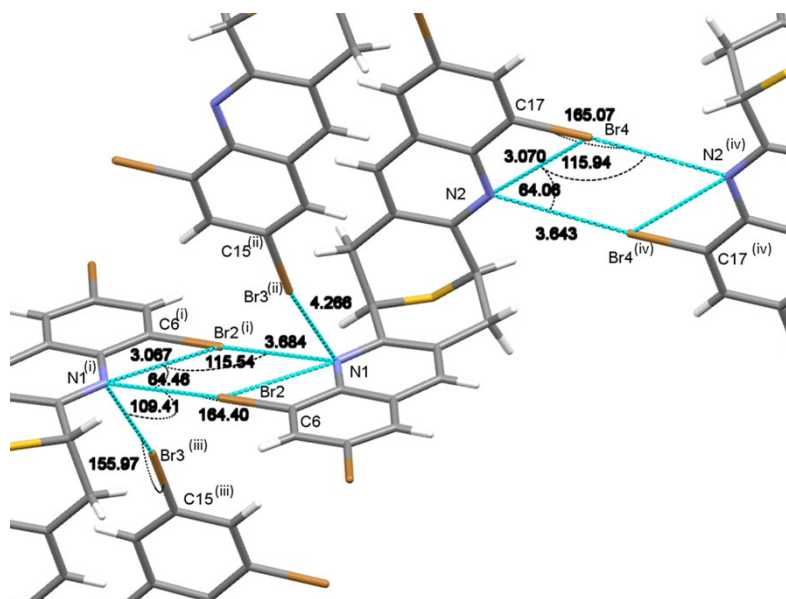

**Fig. S3** The two types of centrosymmetric N/Br cluster present in **12**, the  $(7)_2$ ·(4-methylpyridine) compound.

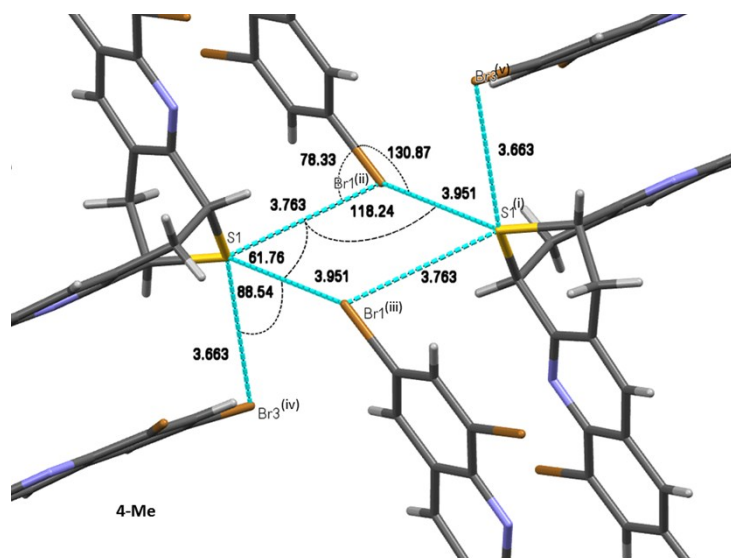

**Fig. S4** The centrosymmetric  $S_2Br_4$  cluster present in structure **12**, the 4-methylpyridine inclusion compound.

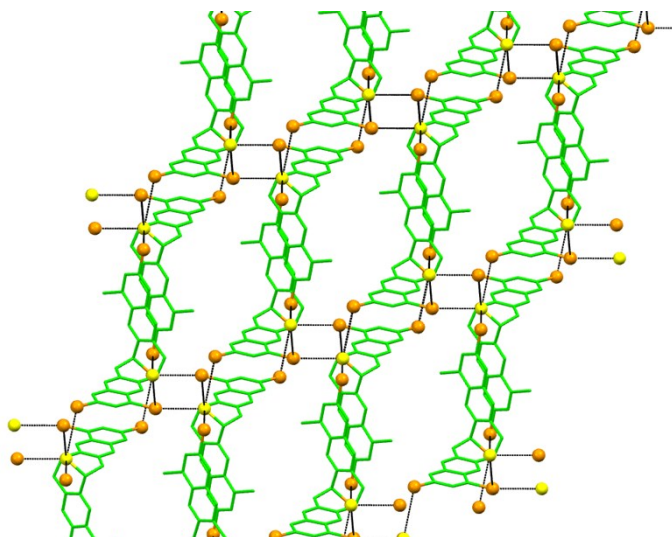

**Fig. S5** The grid of  $S_2Br_6$  clusters present in **14**, the  $(7)_2 \cdot (tert\text{-butylcyclohexane})$  compound, and showing only the  $S \cdots Br$  interactions.

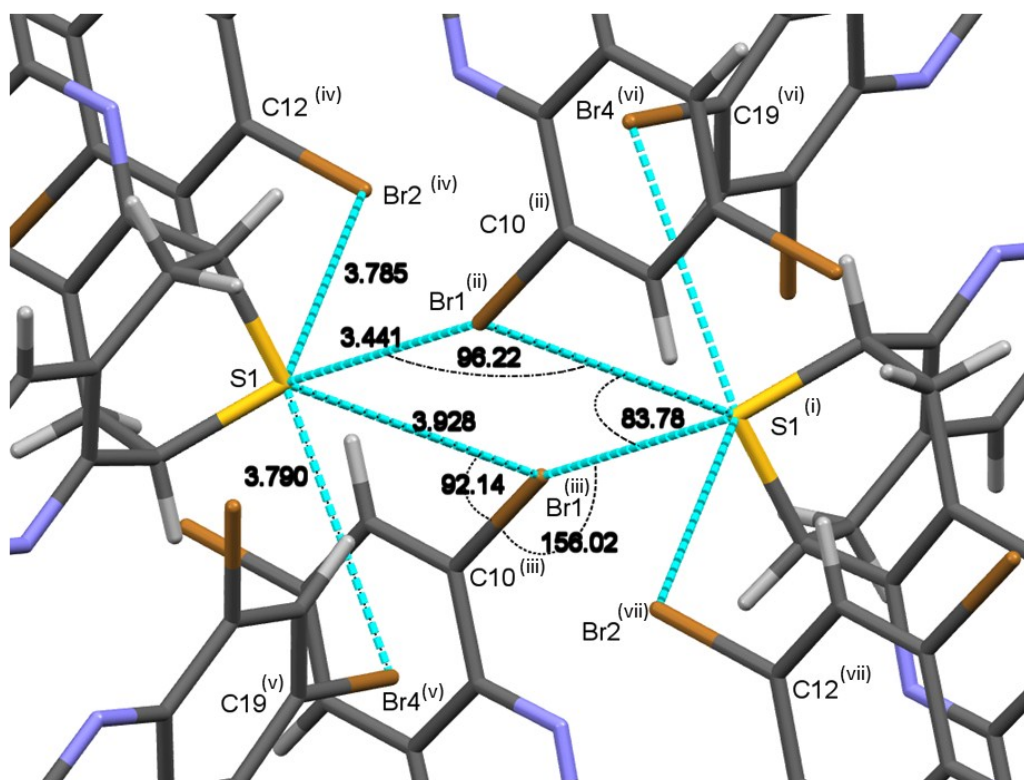

**Fig. S6** The construction of one  $S_2Br_6$  cluster in compound **14** showing only the  $S \cdots Br$  interactions (blue).

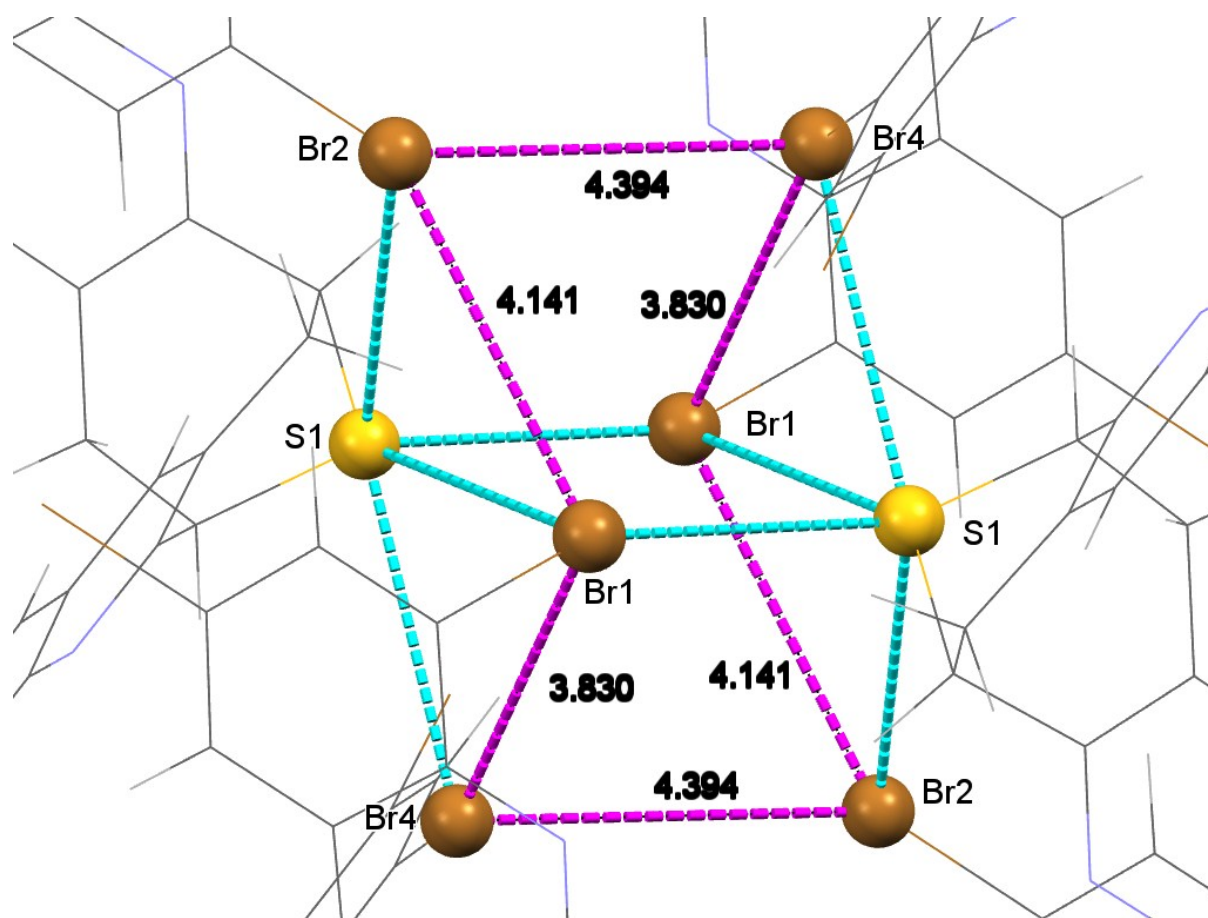

**Fig. S7** The net construction of one  $S_2Br_6$  cluster in compound **14** after the Br/Br contacts (magenta) have been added.
